# Supplementary material for: Metabolomics Elucidates Dose-Dependent Molecular Beneficial Effects of Hesperidin Supplementation in Rats Fed an Obesogenic Diet
Source: Antioxidants (Basel). 2020 Jan 16;9(1):79. doi: 10.3390/antiox9010079 (PMC7023145; doi:10.3390/antiox9010079)

- 1 **Supplementary Figure 1.** NMR spectrum of the hesperidin extract used in the present  
2 study. The peaks 2.86-2.90 ppm were used to determine the proportions of 2S and 2R  
3 enantiomers.

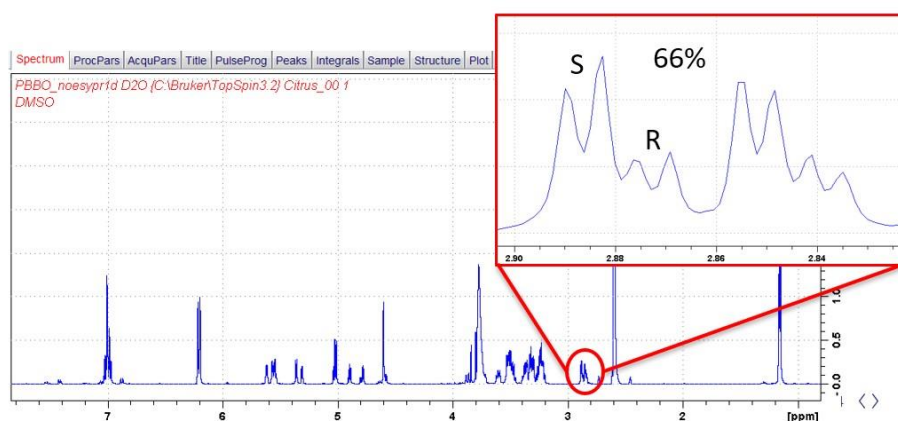

4

5

6 **Supplementary Figure 2.** Study design. CAF, cafeteria diet; H, hesperidin; STD,  
7 standard chow diet; V, vehicle.

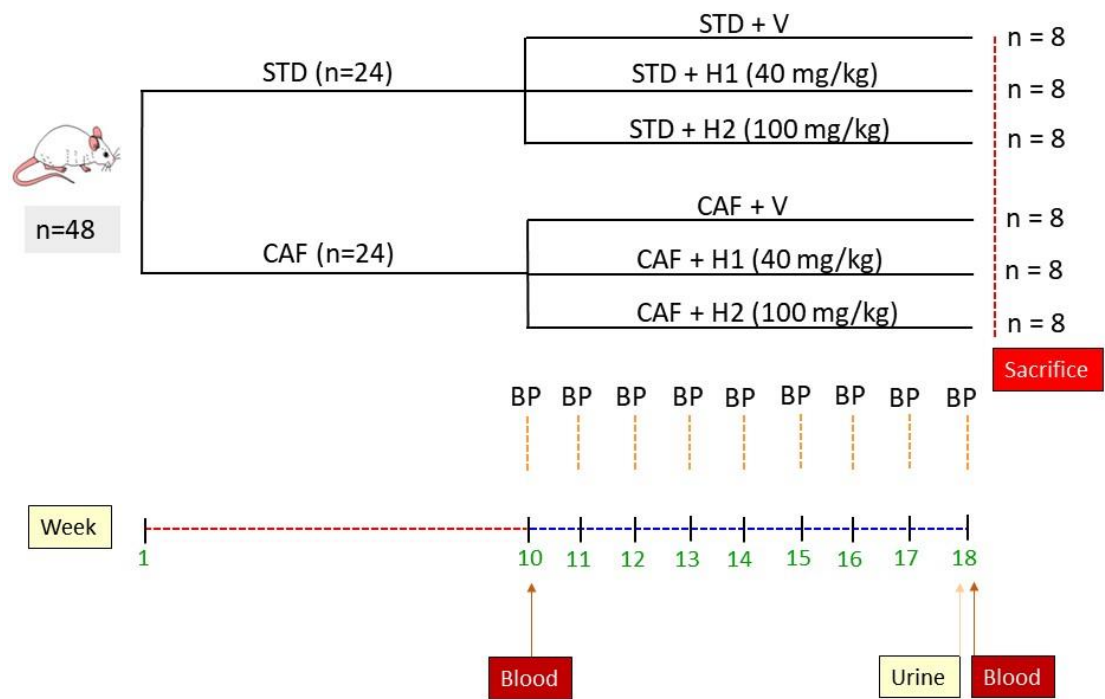

9 **Supplementary Table 1.** Models characteristics. Significant models are shown in bold.

| Model                  | Ortho components | R <sup>2</sup> Y | Q <sup>2</sup> Y | P                |
|------------------------|------------------|------------------|------------------|------------------|
| <i>Urine</i>           |                  |                  |                  |                  |
| <b>STD-V vs CAF-V</b>  | <b>1</b>         | <b>1.0</b>       | <b>0.81</b>      | <b>&lt;0.001</b> |
| <b>STD-V vs STD-H1</b> | <b>7</b>         | <b>1.0</b>       | <b>0.84</b>      | <b>&lt;0.001</b> |
| <b>STD-V vs STD-H2</b> | <b>1</b>         | <b>0.98</b>      | <b>0.87</b>      | <b>&lt;0.001</b> |
| STD-H1 vs STD-H2       | 8                | 1.0              | 0.71             | 0.30             |
| <b>CAF-V vs CAF-H1</b> | <b>2</b>         | <b>1.0</b>       | <b>0.63</b>      | <b>0.006</b>     |
| <b>CAF-V vs CAF-H2</b> | <b>7</b>         | <b>1.0</b>       | <b>0.93</b>      | <b>&lt;0.001</b> |
| CAF-H1 vs CAF-H2       | 3                | 1.0              | 0.40             | 0.15             |
| <i>Serum AQ</i>        |                  |                  |                  |                  |
| <b>STD-V vs CAF-V</b>  | <b>2</b>         | <b>1.0</b>       | <b>0.58</b>      | <b>&lt;0.001</b> |
| STD-V vs STD-H1        | 4                | 1.0              | 0.54             | 0.17             |
| STD-V vs STD-H2        | 4                | 1.0              | 0.58             | 0.21             |
| STD-H1 vs STD-H2       | 4                | 1.0              | 0.49             | 0.36             |
| CAF-V vs CAF-H1        | 3                | 1.0              | 0.36             | 0.60             |
| <b>CAF-V vs CAF-H2</b> | <b>2</b>         | <b>1.0</b>       | <b>0.62</b>      | <b>0.017</b>     |
| CAF-H1 vs CAF-H2       | 4                | 1.0              | 0.82             | 0.03             |
| <i>Serum LIP</i>       |                  |                  |                  |                  |
| <b>STD-V vs CAF-V</b>  | <b>5</b>         | <b>1.0</b>       | <b>0.81</b>      | <b>&lt;0.001</b> |
| STD-V vs STD-H1        | 0                | 0.48             | -0.34            | -                |
| STD-V vs STD-H2        | 0                | 0.44             | -0.06            | -                |
| STD-H1 vs STD-H2       | 0                | 0.36             | -0.13            | -                |
| <b>CAF-V vs CAF-H1</b> | <b>0</b>         | <b>0.48</b>      | <b>0.30</b>      | <b>0.034</b>     |
| <b>CAF-V vs CAF-H2</b> | <b>0</b>         | <b>0.60</b>      | <b>0.51</b>      | <b>0.005</b>     |
| CAF-H1 vs CAF-H2       | 0                | 0.49             | -0.35            | -                |

**Supplementary Figure 3.** OPLS-DA models comparing the metabolic profiles of rats fed a STD or a CAF diet and supplemented with the vehicle (V). A) urine metabolic profiles, B) serum aqueous metabolic profile, C) serum lipid metabolic profile.

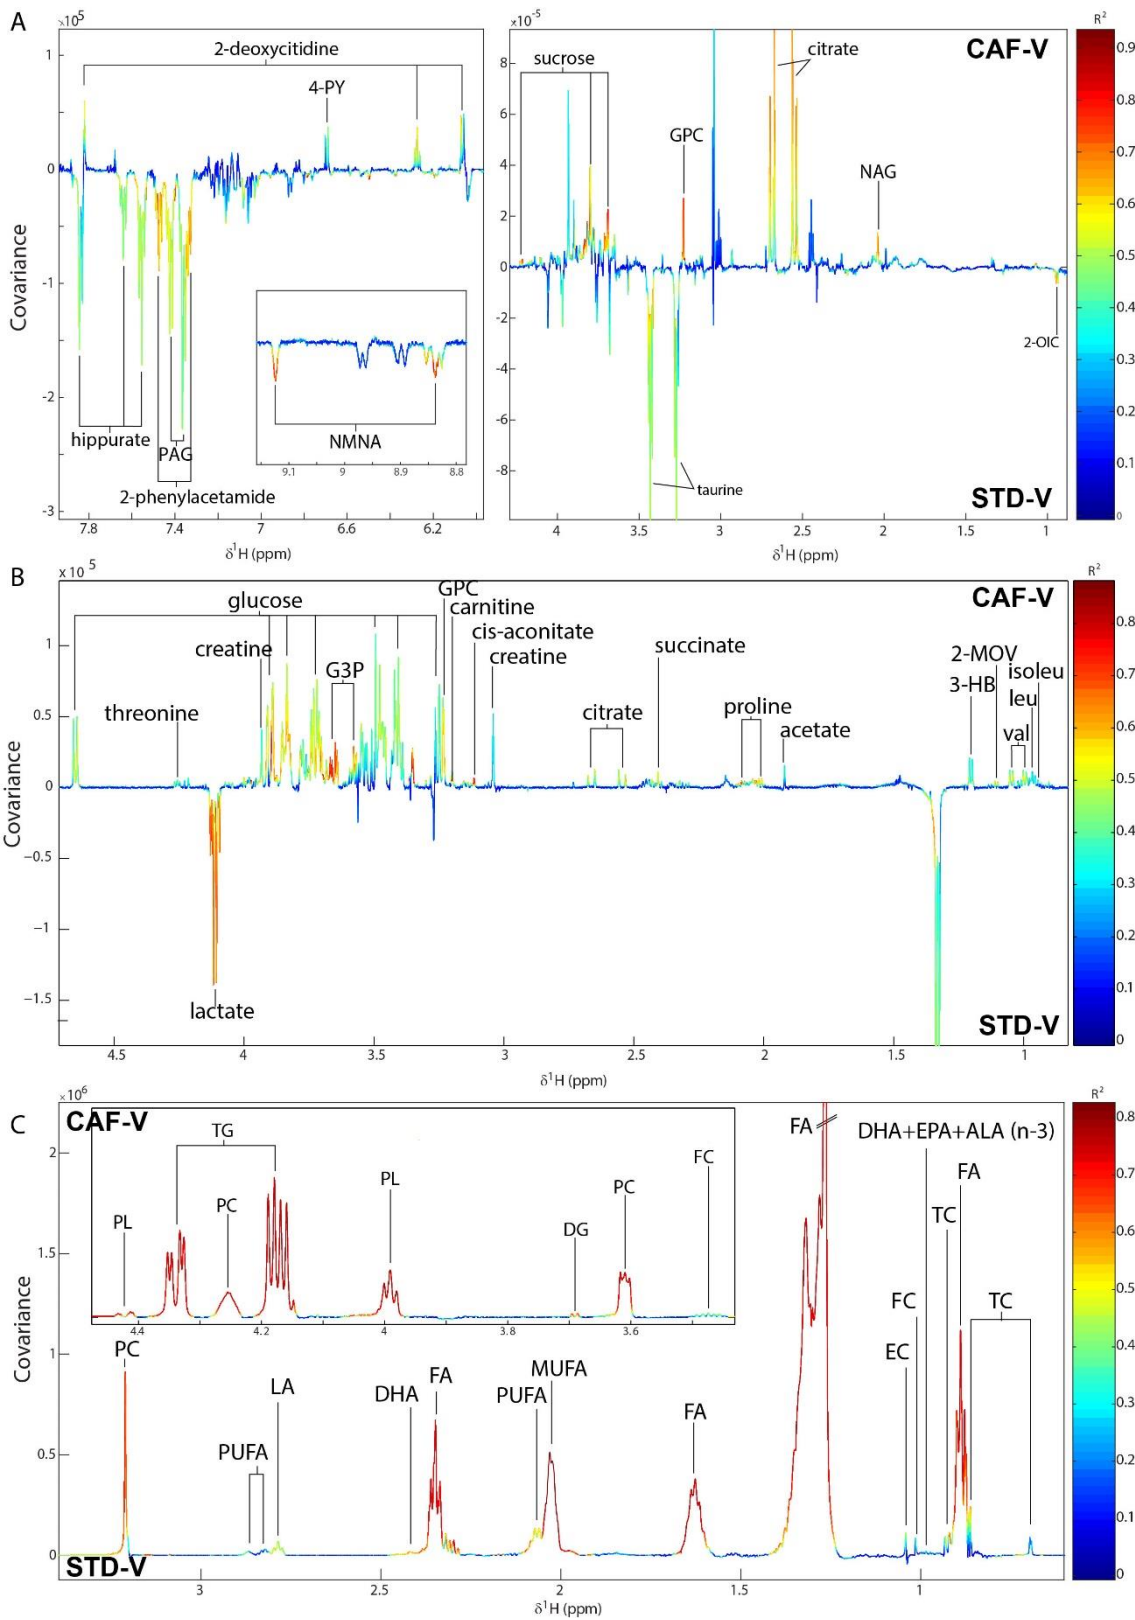

**Supplementary Figure 4.** OPLS-DA models comparing the urine metabolic profiles of STD-fed rats supplemented with either the vehicle (V) or hesperidin at dose1 (H1).

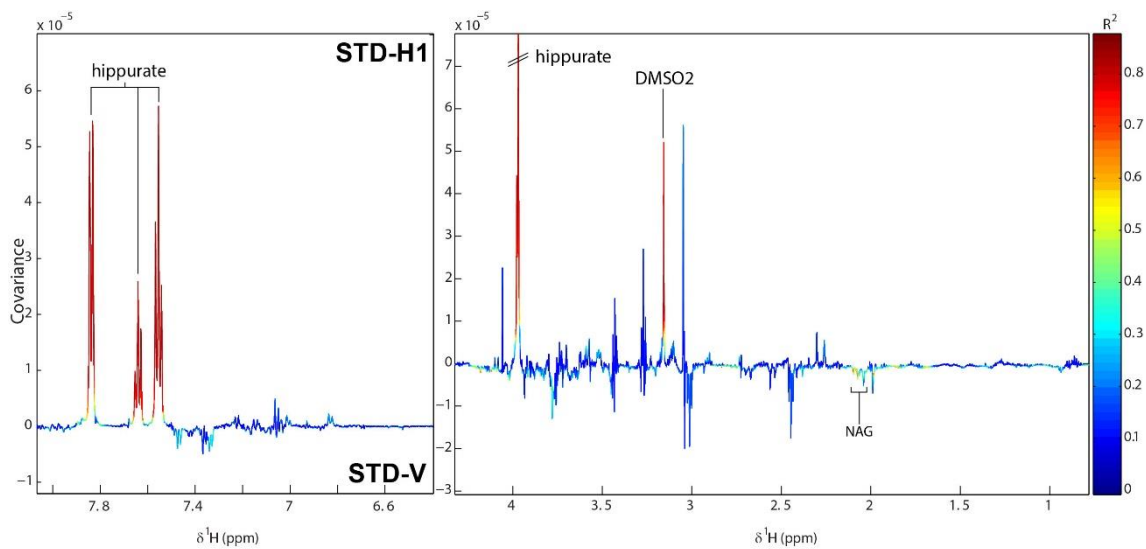

**Supplementary Figure 5.** OPLS-DA models comparing the urine metabolic profiles of STD-fed rats supplemented with either the vehicle (V) or hesperidin at dose2 (H2).

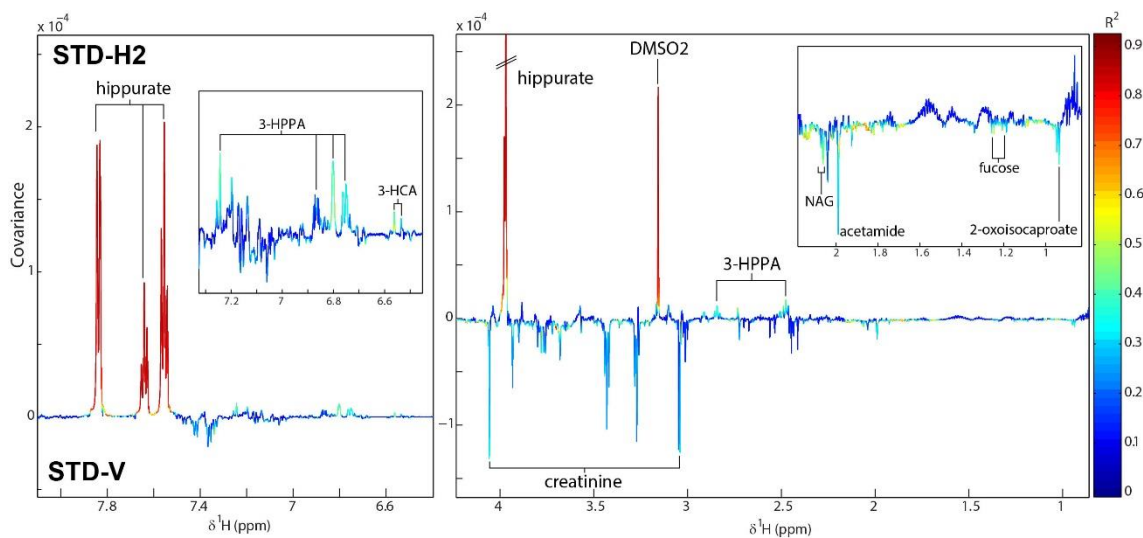

**Supplementary Figure 6.** OPLS-DA models comparing the metabolic profiles of CAF-fed supplemented with either the vehicle (V) or hesperidin at dose1 (H1). A) urine metabolic profile, B) serum lipid metabolic profile.

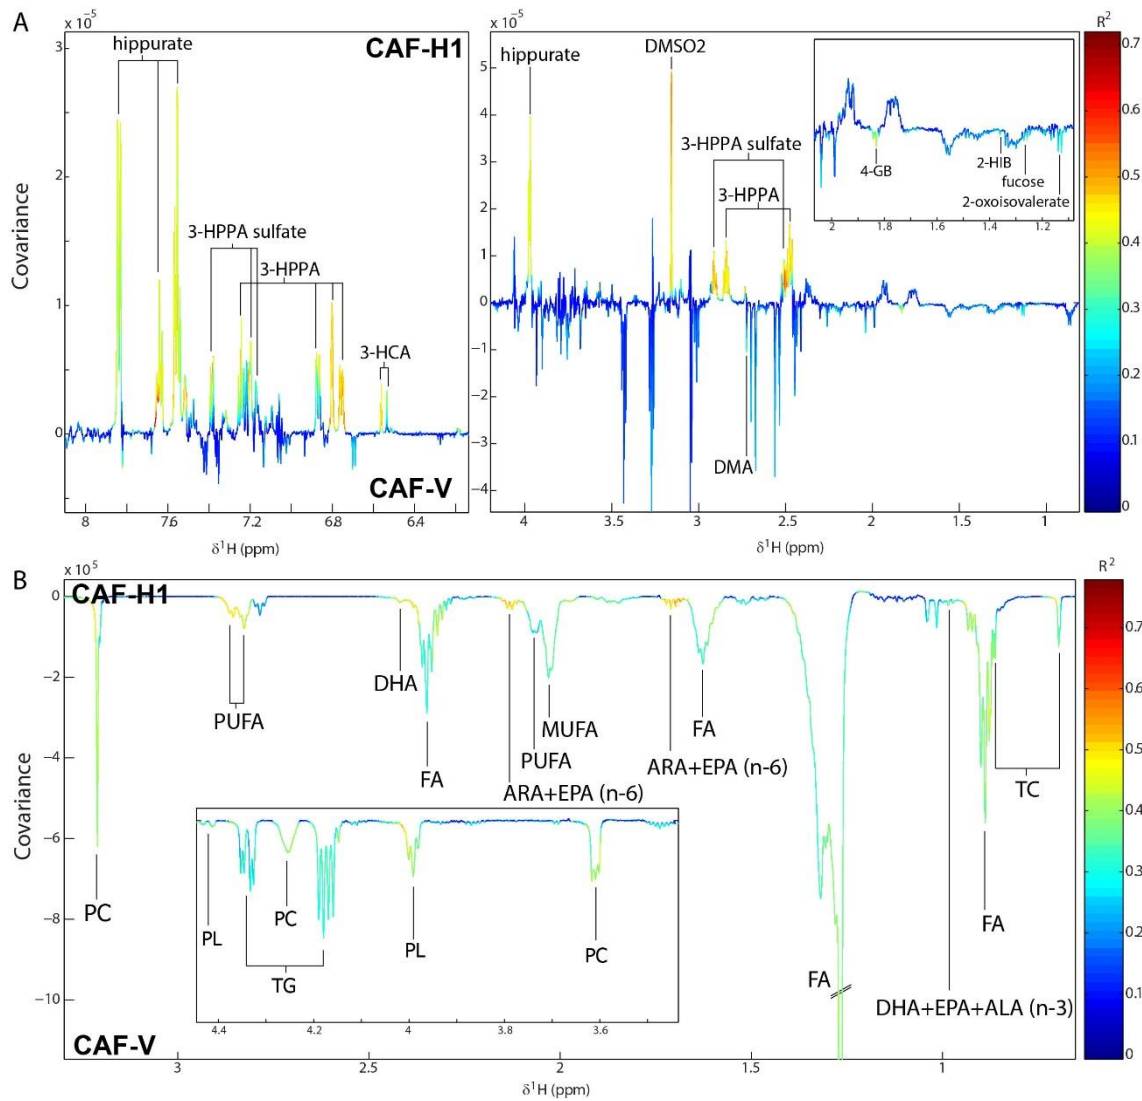

**Supplementary Figure 7.** Correlations between significant metabolites after H2 supplementation and *bacteroidaceae* family in CAF-fed rats. Metabolites in yellow, pink and blue represent urine, serum lipidic, and serum aqueous metabolites.

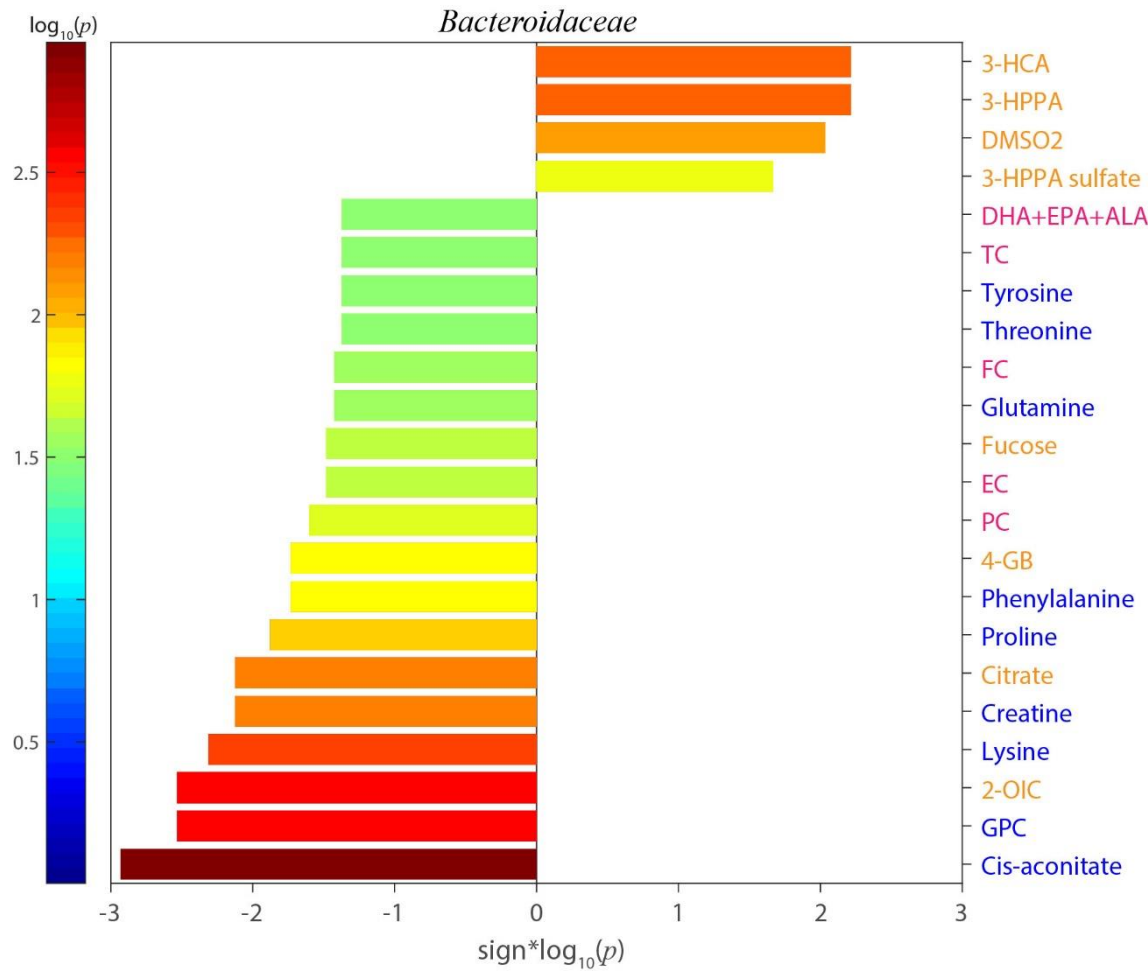

Supplement: Supplementary file 1 [file antioxidants-09-00079-s001.pdf]
